# Supplementary material
Source: PubMed Central journal article supplement (PMC6561789)
Supplement: NIHMS1013303-supplement-Supp_info.pdf [file NIHMS1013303-supplement-Supp_info.pdf]

## *Supplementary Data*

### Structural basis of transcriptional regulation by the HigA antitoxin

Marc A. Schureck<sup>a,1,2</sup>, Jeffrey Meisner<sup>a,1</sup>, Eric D. Hoffer<sup>a</sup>, Dongxue Wang, Nina Onuoha<sup>a</sup>, Shein Eui Cho<sup>a</sup>, Pete Lollar<sup>c</sup> and Christine M. Dunham<sup>a, 2</sup>

<sup>1</sup>These authors contributed equally to this work.

<sup>2</sup>To whom correspondence should be addressed. Email: [christine.m.dunham@emory.edu](mailto:christine.m.dunham@emory.edu)

<sup>a</sup>Department of Biochemistry, Emory University School of Medicine, Atlanta, GA, 30322.

<sup>b</sup>Present address: The Laboratory of Malaria and Vector Research, National Institute of Allergy and Infectious Diseases, National Institutes of Health, Rockville, MD 20852, USA.

<sup>c</sup>Aflac Cancer and Blood Disorders Center, Children's Healthcare of Atlanta; Department of Pediatrics, Emory University School of Medicine, Atlanta, GA, 30322.

**Data deposition:** Crystallography, atomic coordinates, and structure factors have been deposited in the Protein Data Bank, [www.pdb.org](http://www.pdb.org) (PDB codes 6CF1, 6CHV)

**Key words:** toxin-antitoxin complex, DNA-binding protein, stringent response, transcriptional repressor

## Supplementary Tables

**Table S1. Crystallographic statistics.**

|                                          | HigA                 | HigA-higO2           |
|------------------------------------------|----------------------|----------------------|
| <b>Data Collection</b>                   |                      |                      |
| Space group                              | C2                   | P6 <sub>5</sub>      |
| Cell dimensions                          | 105 40.7 45.3        | 79.4 79.4 399        |
| a, b, c,                                 | 90 105.5 90          | 90 90 120            |
| $\alpha$ , $\beta$ , $\gamma$ ,          |                      |                      |
| Resolution (Å)                           | 44 - 1.9 (2.0 - 1.9) | 41 - 2.9 (3.0 - 2.9) |
| R <sub>merge</sub> (%)                   | 11 (69)              | 13 (42)              |
| R <sub>pim</sub> (%)                     | 4.8 (29)             | 3.6 (12)             |
| CC1/2 (%)                                | 99 (83)              | 99 (99)              |
| I/ $\sigma$ I                            | 11 (2.5)             | 12 (3.2)             |
| Completeness (%)                         | 99 (99)              | 100 (100)            |
| Redundancy                               | 6.5 (6.5)            | 14 (14)              |
| <b>Refinement</b>                        |                      |                      |
| Resolution                               | 44 - 1.9             | 41 - 2.9             |
| No. unique reflections                   | 14530                | 31822                |
| R <sub>work</sub> /R <sub>free</sub> (%) | 18.0/21.8            | 22.5/26.0            |
| R.m.s. deviations                        |                      |                      |
| Bond lengths                             | 0.014                | 0.004                |
| Bond angles                              | 1.45                 | 0.59                 |

**Table S2. Strains.**

| Strain    | Genotype                                                                                                                                                                                                                                              |
|-----------|-------------------------------------------------------------------------------------------------------------------------------------------------------------------------------------------------------------------------------------------------------|
| BW25113   | <i>Escherichia coli</i> $\Delta$ (araBAD)567 $\Delta$ (rhaBAD)568 $\Delta$ lacZ4787(::rrnB-3) hsdR514 rph-1                                                                                                                                           |
| BL21(DE3) | <i>Escherichia coli</i> strain B F <sup>-</sup> ompT gal dcm lon hsdS <sub>B</sub> (r <sub>B</sub> <sup>-</sup> m <sub>B</sub> <sup>-</sup> ) $\lambda$ (DE3 [lacI lacUV5-T7p07 ind1 sam7 nin5]) [malB <sup>+</sup> ] <sub>K-12</sub> ( $\lambda^S$ ) |
| ECJM901   | BL21(DE3) pET28a-his6-Rts1 higA                                                                                                                                                                                                                       |
| ECJM730   | BW25113 pBAD33                                                                                                                                                                                                                                        |
| ECJM765   | BW25113 pBAD33-Rts1 higB                                                                                                                                                                                                                              |
| ECJM821   | BW25113 pBAD33-Rts1 higB-higA                                                                                                                                                                                                                         |
| ECJM898   | BW25113 pBAD33-Rts1 higB-higA $\Delta$ 84-104                                                                                                                                                                                                         |
| ECJM820   | BW25113 pQF50-Rts1 Phig-lacZ                                                                                                                                                                                                                          |
| ECJM908   | BW25113 pQF50-Rts1 Phig-higA-lacZ                                                                                                                                                                                                                     |
| ECJM909   | BW25113 pQF50-Rts1 Phig- higA $\Delta$ 84-104-lacZ                                                                                                                                                                                                    |
| ECJM833   | BW25113 pQF50-Rts1 Phig-lacZ pBAD33                                                                                                                                                                                                                   |
| ECJM885   | BW25113 pQF50-Rts1 Phig-lacZ pBAD33-Rts1 higA                                                                                                                                                                                                         |
| ECJM900   | BW25113 pQF50-Rts1 Phig-lacZ pBAD33-Rts1 higA $\Delta$ 84-104                                                                                                                                                                                         |
| ECJM925   | BW25113 pBAD33-Rts1 higB-higA R40A                                                                                                                                                                                                                    |
| ECJM914   | BW25113 pQF50-Rts1 Phig-lacZ pBAD33-Rts1 higA R40A                                                                                                                                                                                                    |
| ECJM902   | BL21(DE3) pET28a-his6-Rts1 higA R40A                                                                                                                                                                                                                  |

**Table S3. Plasmids.**

| Plasmid               | Description or reference                                  |
|-----------------------|-----------------------------------------------------------|
| pBAD33                | (Guzman et al. 1995)                                      |
| pQF50                 | (Farinha and Kropinski 1990)                              |
| pET28a-his6-Rts1 higA | (Hurley and Woychik 2009)                                 |
| pJM346                | pBAD33-Rts1 <i>higB</i>                                   |
| pJM362                | pBAD33-Rts1 <i>higB-higA</i>                              |
| pJM380                | pBAD33-Rts1 <i>higB-higA<math>\Delta</math>84-104</i>     |
| pJM359                | pQF50-Rts1 <i>Phig-lacZ</i>                               |
| pJM384                | pQF50-Rts1 <i>Phig-higA-lacZ</i>                          |
| pJM385                | pQF50-Rts1 <i>Phig-higA<math>\Delta</math>84-104-lacZ</i> |
| pJM360                | pBAD33-Rts1 <i>higA</i>                                   |
| pJM378                | pBAD33-Rts1 <i>higA<math>\Delta</math>84-104</i>          |
| pJM381                | pBAD33-Rts1 <i>higB-higA R40A</i>                         |
| pJM386                | pBAD33-Rts1 <i>higA R40A</i>                              |
| pJM382                | pET28a-his6-Rts1 <i>higA R40A</i>                         |

**Table S4. Oligonucleotides.**

| Oligo         | Sequence                                                            |
|---------------|---------------------------------------------------------------------|
| oJM821        | cgctgcagacaccatgtaatacagagatgg                                      |
| oRJD2         | aataataagcttagtgataatcctcataatttaaaatgtaagcatcacc<br>g              |
| oJM837        | cgcaagcttttaatgctcttgcgcgttctg                                      |
| oJM862        | cgcaagcttttagatttggttttctaactggcgag                                 |
| oJM835        | ggtattgcacatcgtgtaatatcgcggtatagtattacacaccatgtaa<br>taca           |
| oJM836        | agcttgtattacatgggtgtgtaatactataaccgcatattacacgatgt<br>gcaatacctgca  |
| oJM863        | cgtattgcacatcgtgtaatatcgcggtatagtattacacaccatgtaa<br>tacg           |
| oJM864        | gatccgtattacatgggtgtgtaatactataaccgcatattacacgatgt<br>gcaatacgcgatg |
| oJM865        | cgcgatccttttaaattatgaggattatcactaatg                                |
| oJM823        | cgctgcagtagagggtattaataatgagacaattcaaggtttcac                       |
| pHigA_F       | tgtattgcacatcgtgtaatatcgcggtatagtattacacaccatgtaa<br>tacagagatggc   |
| pHigA_R       | gccatctctgtattacatgggtgtgtaatactataaccgcatattacacg<br>atgtgcaataca  |
| pHigA_F_Scra1 | tcagccatgtggacacccccggcgcggtatagtattacacaccatgtaa<br>tacagagatggc   |
| pHigA_R_Scra1 | gccatctctgtattacatgggtgtgtaatactataaccgcgccgggggtgt<br>ccacatggctga |
| pHigA_F_Scra2 | tgtattgcacatcgtgtaatatcgcggtatacagccatgtggacacccc<br>cggagagatggc   |

|               |                                                                     |
|---------------|---------------------------------------------------------------------|
| pHigA_R_Scra2 | gccatctctccgggggtgtccacatggctgtataccgcgatattacacg<br>atgtgcaataca   |
| pHigCryst3    | gtattacacaccatgtaatac                                               |
| pHigCryst4    | gtattacatgggtgtgtaatac                                              |
| oJM870        | cgtatccgctctacttgcggggaaaactgcggttgaccct                            |
| oJM871        | gcaagtagagcggatacggttgctggtgtaacaccaatattgtgagc                     |
| oJM868        | tcagccatgtggacacccccggcgcggtatagtattatacaccatataa<br>tacagagatggc   |
| oJM869        | gccatctctgtattatatgggtgtataataactataccgcgccgggggtgt<br>ccacatggctga |

---

## Supplementary Figures

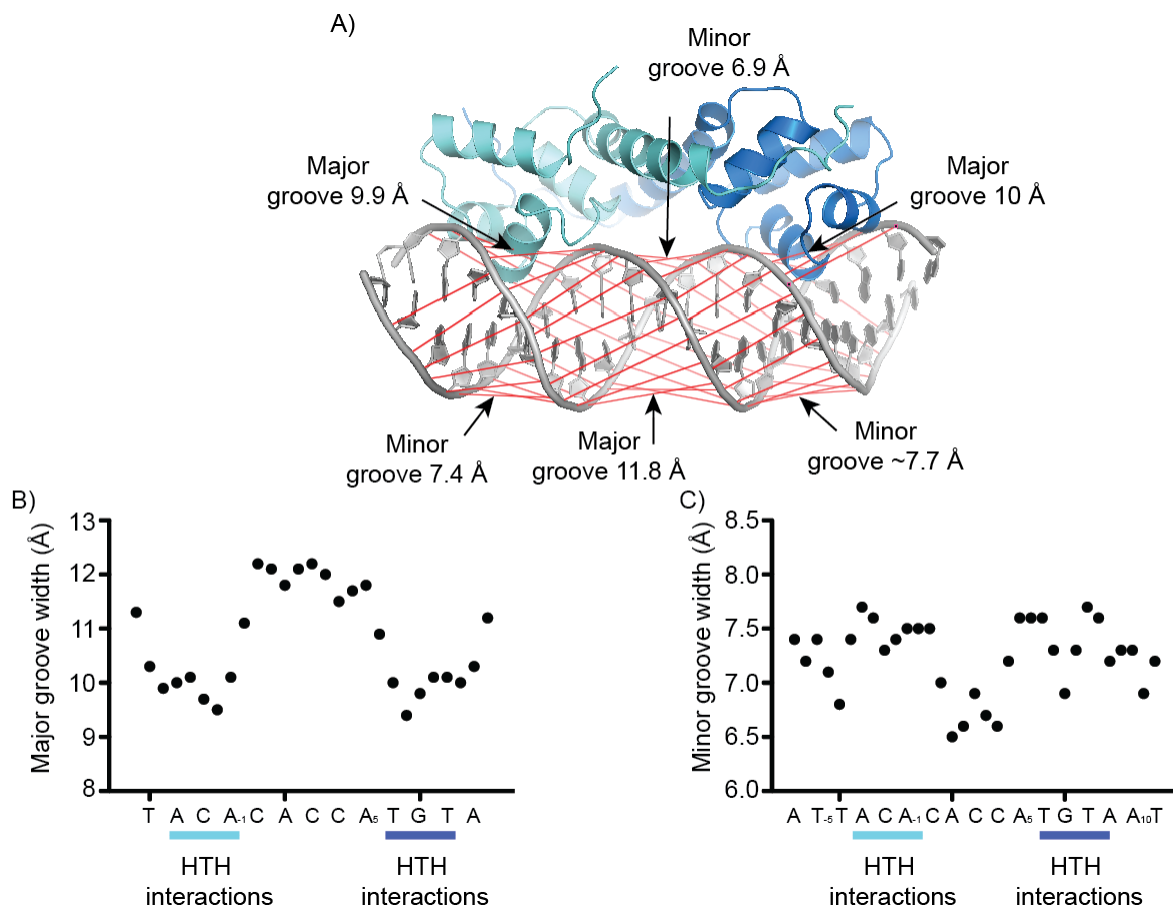

**Figure S1. Analysis of *higO2* major and minor groove widths.** A) Structure of HigA bound to *higO2* with major and minor groove distances calculated by Curves+ depicted as red lines. B) Major groove and C) minor groove distances calculated by Curves+. The van der Waals surface of the phosphodiester backbone was kept at 2.9 Å when calculating the major and minor groove widths.

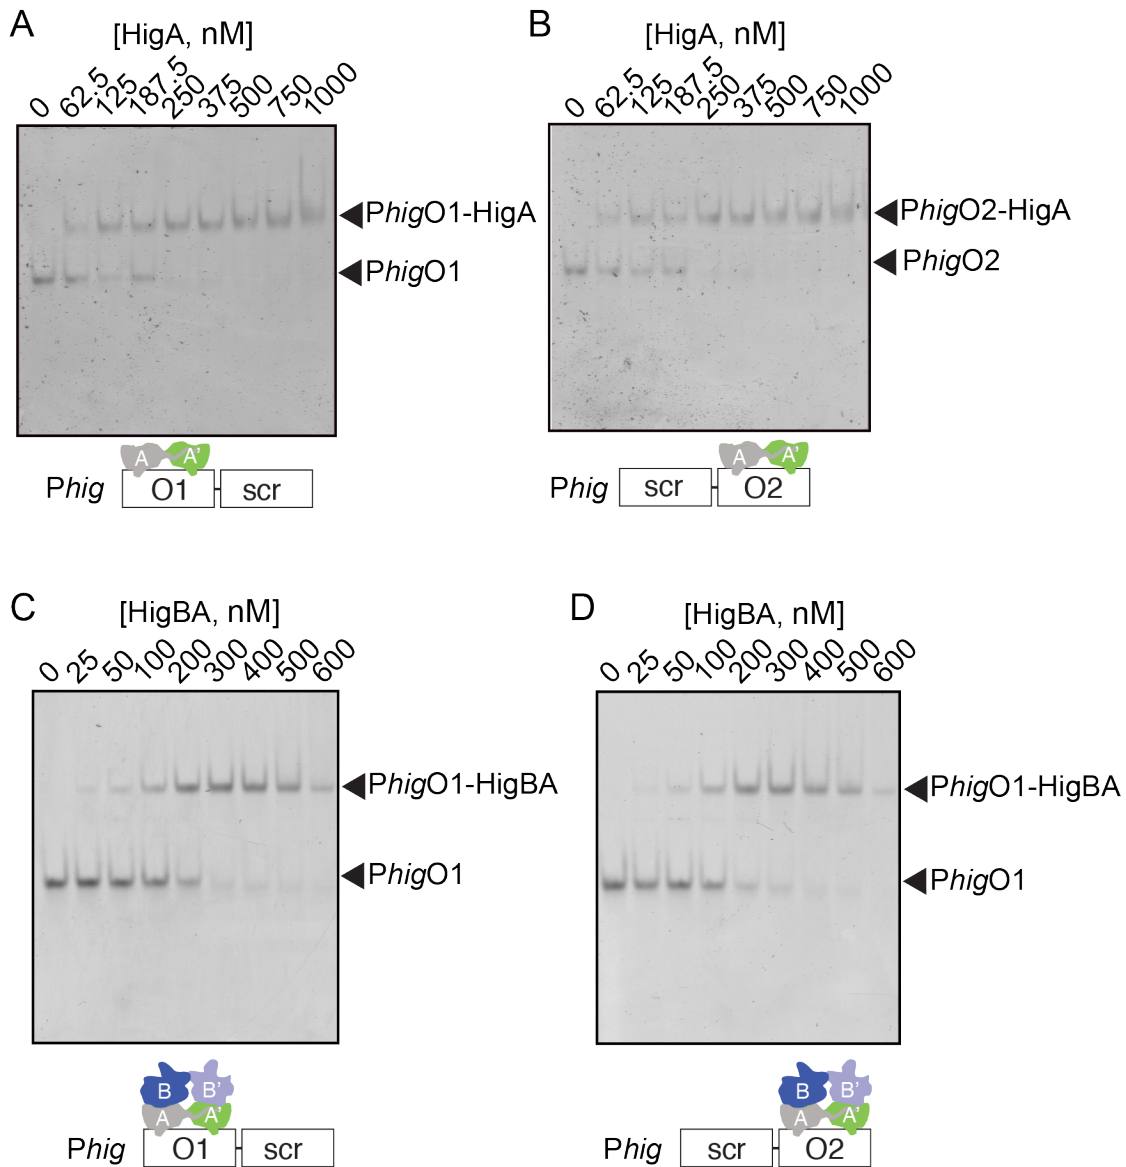

**Figure S2. HigA and HigBA recognition of *higO1* or *higO2*.** Electrophoretic mobility shift assays of HigA protein and *Phig* containing *higO1* and a scrambled *higO2* (A), HigA protein and *Phig* containing *higO2* and a scrambled *higO1* (B), HigBA protein and *Phig* containing *higO1* and a scrambled *higO2* (C), and HigBA protein and *Phig* containing *higO2* and a scrambled *higO1*. Under each panel is a schematic of the interactions of the HigA dimer and the HigBA complex with *PhigO1*-*O2*. Each HigA and HigB monomer are labeled as A and A', and B and B', respectively. HigA and HigBA concentrations are shown in nM above each gel.

## References

- Farinha MA, Kropinski AM. 1990. Construction of broad-host-range plasmid vectors for easy visible selection and analysis of promoters. *J Bacteriol* **172**: 3496-3499.
- Guzman LM, Belin D, Carson MJ, Beckwith J. 1995. Tight regulation, modulation, and high-level expression by vectors containing the arabinose PBAD promoter. *J Bacteriol* **177**: 4121-4130.
- Hurley JM, Woychik NA. 2009. Bacterial toxin HigB associates with ribosomes and mediates translation-dependent mRNA cleavage at A-rich sites. *J Biol Chem* **284**: 18605-18613.
